# Supplementary material for: Genome-Wide mRNA and Long Non-Coding RNA Analysis of Porcine Trophoblast Cells Infected with Porcine Reproductive and Respiratory Syndrome Virus Associated with Reproductive Failure
Source: MDPI journal article supplement (doi:10.3390/ijms24020919), 2023-01-04
Supplement: s1 [file s1]

**Supplement Table S1:**

The top 20 KEGG pathways of dysfunctional mRNAs

| Pathway term                                | Rich factor | Q value     | Gene number |
|---------------------------------------------|-------------|-------------|-------------|
| Chronic myeloid leukemia                    | 0.536231884 | 0.21491223  | 37          |
| Prostate cancer                             | 0.505882353 | 0.21491223  | 43          |
| Notch signaling pathway                     | 0.590909091 | 0.21491223  | 26          |
| Acute myeloid leukemia                      | 0.555555556 | 0.21491223  | 30          |
| Thyroid hormone signaling pathway           | 0.451327434 | 0.227748452 | 51          |
| Protein processing in endoplasmic reticulum | 0.413580247 | 0.227748452 | 67          |
| Epstein-Barr virus infection                | 0.402116402 | 0.227748452 | 76          |
| Ubiquitin mediated proteolysis              | 0.425373134 | 0.227748452 | 57          |
| mRNA surveillance pathway                   | 0.464285714 | 0.227748452 | 39          |
| Hippo signaling pathway                     | 0.420289855 | 0.227748452 | 58          |
| Pathways in cancer                          | 0.369905956 | 0.227748452 | 118         |
| Lysine degradation                          | 0.52        | 0.24312213  | 26          |
| Cell cycle                                  | 0.426086957 | 0.252596335 | 49          |
| AMPK signaling pathway                      | 0.423728814 | 0.252596335 | 50          |
| Adherens junction                           | 0.464788732 | 0.263236493 | 33          |
| Endocytosis                                 | 0.383495146 | 0.263236493 | 79          |
| Hepatitis B                                 | 0.397350993 | 0.3036949   | 60          |
| Spliceosome                                 | 0.403100775 | 0.327198397 | 52          |
| Endometrial cancer                          | 0.489795918 | 0.327198397 | 24          |
| Bladder cancer                              | 0.514285714 | 0.415456227 | 18          |
