# Supplementary material for: Genome-Wide mRNA and Long Non-Coding RNA Analysis of Porcine Trophoblast Cells Infected with Porcine Reproductive and Respiratory Syndrome Virus Associated with Reproductive Failure
Source: MDPI journal article supplement (doi:10.3390/ijms24020919), 2023-01-04
Supplement: s1 [file s1]

**Supplement Table S2:**

The top 20 KEGG pathways of dysfunctional lncRNAs

| Pathway term                                           | Rich factor | Q value  | Gene number |
|--------------------------------------------------------|-------------|----------|-------------|
| ABC transporters                                       | 0.209302    | 0.089842 | 9           |
| Amoebiasis                                             | 0.140187    | 0.089842 | 15          |
| Arrhythmogenic right ventricular cardiomyopathy (ARVC) | 0.149254    | 0.173916 | 10          |
| Propanoate metabolism                                  | 0.230769    | 0.173916 | 6           |
| Protein digestion and absorption                       | 0.1375      | 0.173916 | 11          |
| Bile secretion                                         | 0.144928    | 0.173916 | 10          |
| Focal adhesion                                         | 0.097938    | 0.242681 | 19          |
| Vasopressin-regulated water reabsorption               | 0.162791    | 0.276446 | 7           |
| Fatty acid metabolism                                  | 0.155556    | 0.299105 | 7           |
| ECM-receptor interaction                               | 0.121951    | 0.299105 | 10          |
| Pancreatic secretion                                   | 0.114943    | 0.383213 | 10          |
| Axon guidance                                          | 0.10084     | 0.466818 | 12          |
| Estrogen signaling pathway                             | 0.103093    | 0.502549 | 10          |
| Nicotine addiction                                     | 0.151515    | 0.502549 | 5           |
| Dilated cardiomyopathy                                 | 0.107143    | 0.502549 | 9           |
| Dorso-ventral axis formation                           | 0.173913    | 0.502549 | 4           |
| Fatty acid biosynthesis                                | 0.230769    | 0.502549 | 3           |
| Insulin secretion                                      | 0.104651    | 0.502549 | 9           |
| PI3K-Akt signaling pathway                             | 0.073171    | 0.674516 | 24          |
| cAMP signaling pathway                                 | 0.079602    | 0.69516  | 16          |
